# Supplementary material for: Ferrofluid-based dispersive liquid–liquid microextraction using a deep eutectic solvent as a support: applications in the analysis of polycyclic aromatic hydrocarbons in grilled meats
Source: Royal Society of Chemistry journal article supplement (doi:10.1039/d0ay00073f), 2020-01-01
Supplement: d0ay00073f1.pdf [file d0ay00073f1.pdf]

### Supplementary Data

#### **Ferrofluid-based dispersive liquid-liquid microextraction using a deep eutectic solvent as a support; Application in analysis of polycyclic aromatic hydrocarbons in grilled meats**

Abolghasem Jouyban<sup>1</sup>, Mir Ali Farajzadeh<sup>2,3</sup>, Mahboob Nemati<sup>4</sup>, Ali Akbar Alizadeh Nabil<sup>5</sup>, Mohammad Reza Afshar Mogaddam<sup>5\*</sup>

*<sup>1</sup>Pharmaceutical Analysis Research Center and Faculty of Pharmacy, Tabriz University of Medical Sciences, Tabriz, Iran*

*<sup>2</sup>Department of Analytical Chemistry, Faculty of Chemistry, University of Tabriz, Tabriz, Iran*

*<sup>3</sup>Engineering Faculty, Near East University, 99138 Nicosia, North Cyprus, Mersin 10, Turkey*

*<sup>4</sup> Drug Applied Research Center and Faculty of Pharmacy, Tabriz University of Medical Sciences, Tabriz, Iran*

*<sup>5</sup>Food and Drug Safety Research Center, Tabriz University of Medical Sciences, Tabriz, Iran*

\*Corresponding author: M. R. Afshar Mogaddam

Tel.: +98 41 31773323

Fax: +98 41 31773333

E-mail address: mr.afsharmogaddam@yahoo.com

Figure S1 shows the FT-IR spectra of  $\text{Fe}_3\text{O}_4$  and  $\text{Fe}_3\text{O}_4@\text{TEOS}$ . The strong peak around  $585\text{ cm}^{-1}$  is attributed to Fe-O bond in  $\text{Fe}_3\text{O}_4$ . In comparison to Fig. S1a, Figure S1b has new peaks at  $1052$  (stretching vibration of Si-O bond in  $\text{SiO}_2$ ) and  $1629$  and  $3482\text{ cm}^{-1}$  (related to O-H).

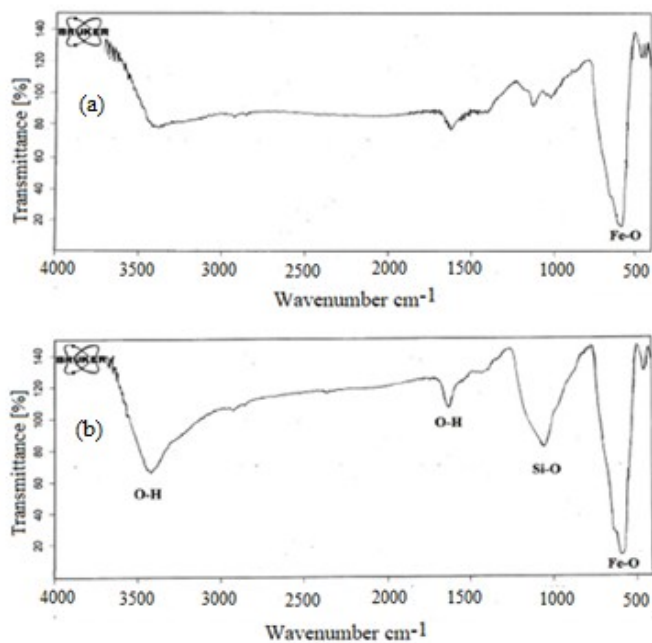

Fig. S1. FT-IR spectra of (a)  $\text{Fe}_3\text{O}_4$ , and (b)  $\text{Fe}_3\text{O}_4@\text{TEOS}$ .

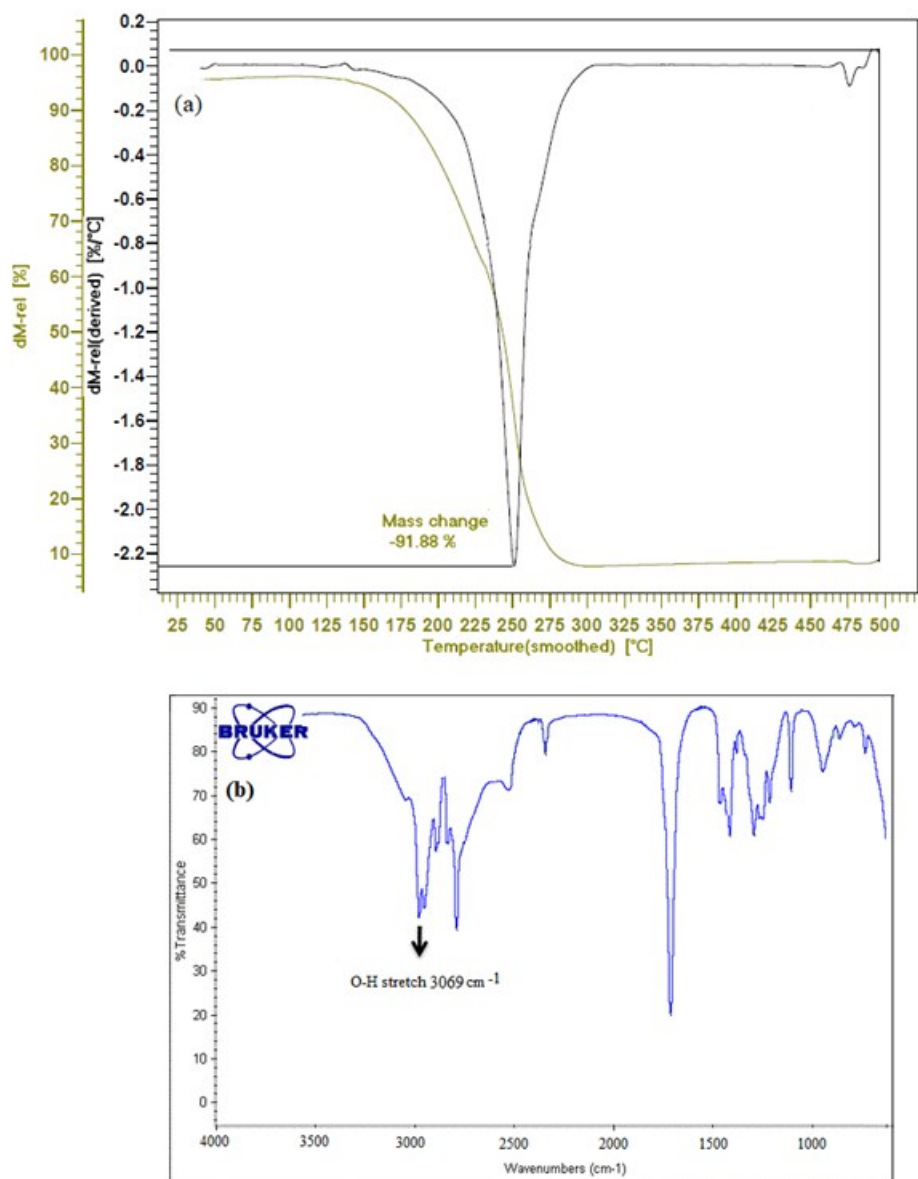

Fig. S2. TGA thermogram (a) and FT-IR spectrum (b) of the prepared DES.

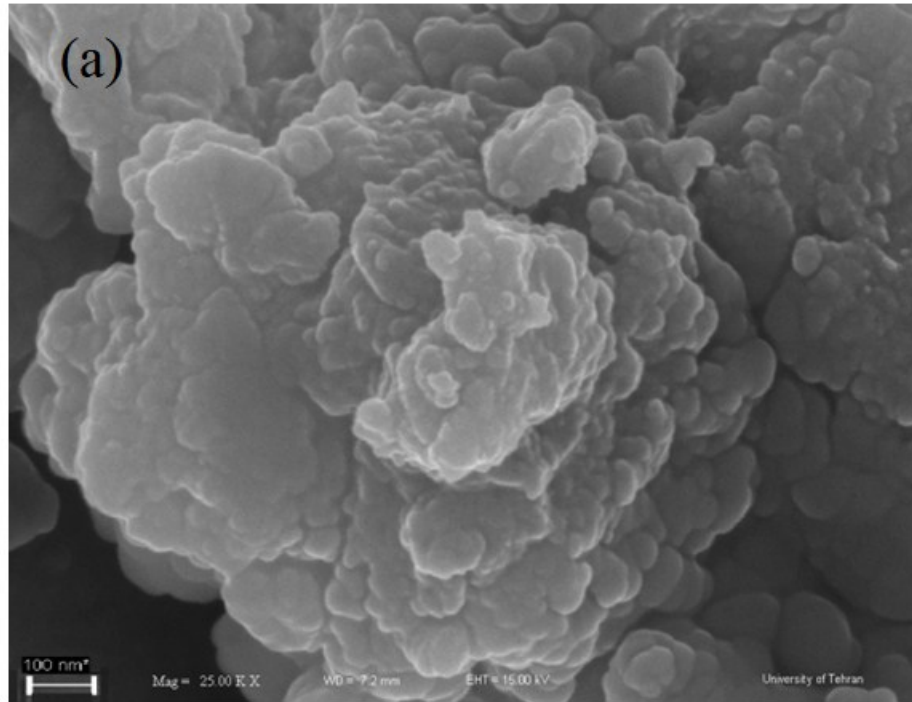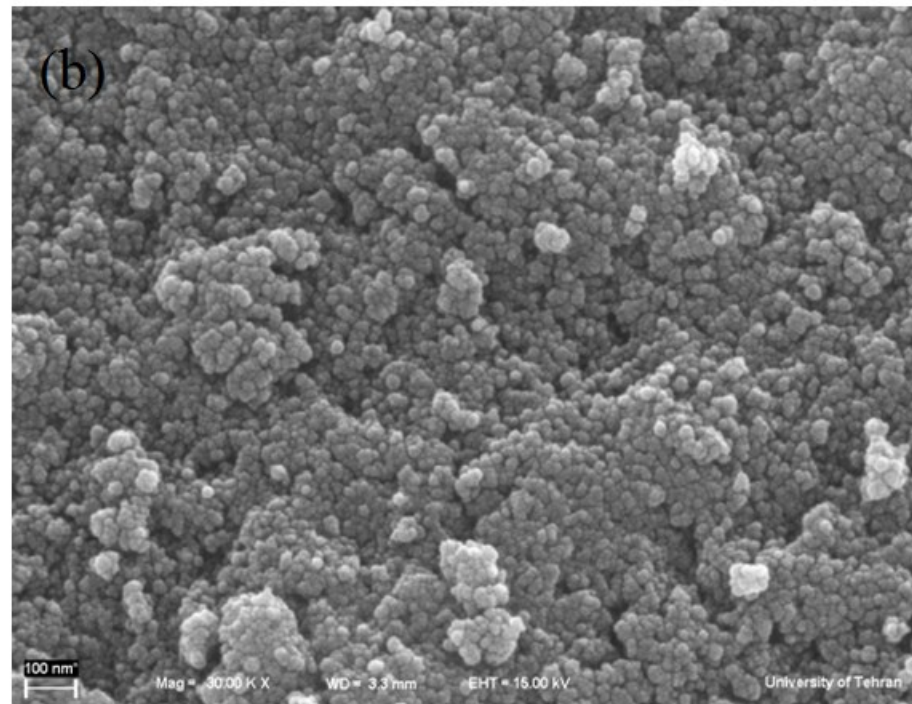

Fig. S3 SEM image of (a) the  $\text{Fe}_3\text{O}_4@\text{TEOS}$  magnetic nanoparticles and (b) the prepared ferrofluid.

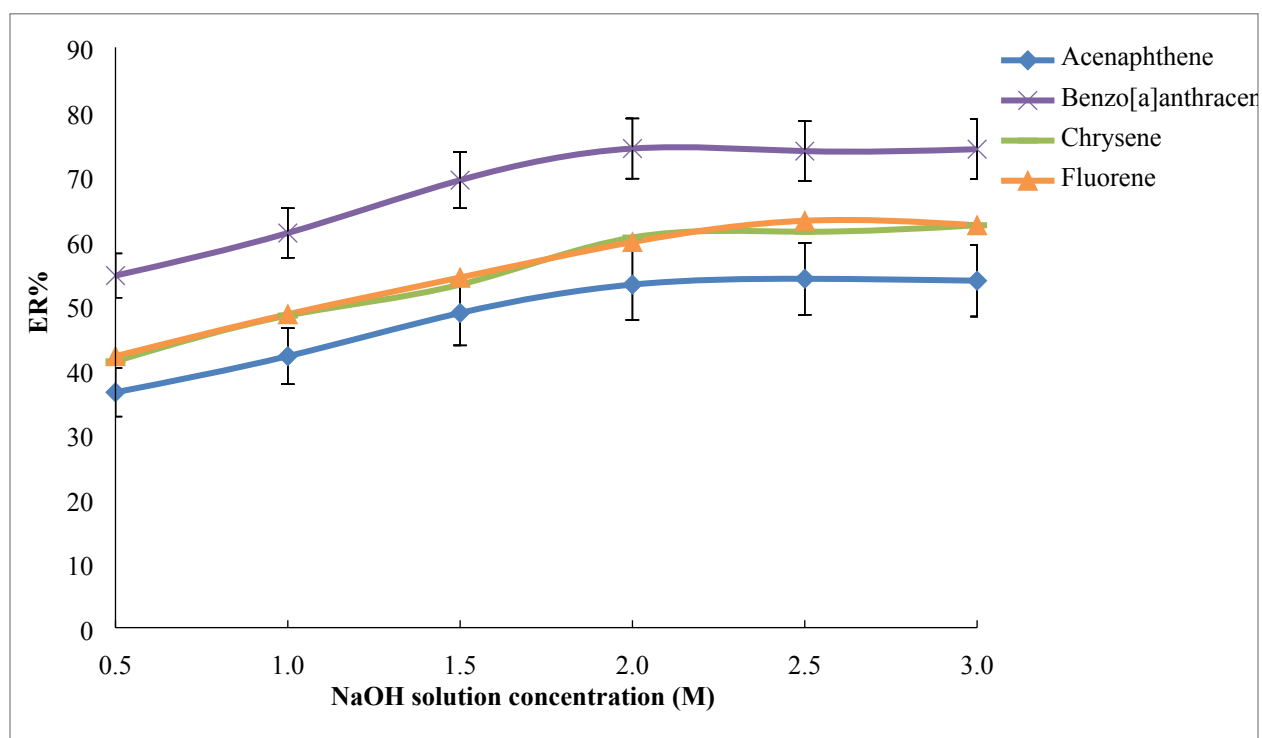

Fig. S4. Optimization of NaOH solution concentration.

Extraction conditions: sample weight, 10 g spiked with a concentration of 10 ng g<sup>-1</sup> of each PAH; acetonitrile volume, 2.5 mL; flow rate, 1.5 mL min<sup>-1</sup>; solid sodium sulfate filled in extraction barrel, 2 g; extractant in DLLME (volume), Fe<sub>3</sub>O<sub>4</sub>@TEOS@PChCl:menthol:decanoic acid (100 μL); aqueous phase in DLLME, 5 mL deionized water; sonication time, 3 min and back-extraction solvent: 10 μL *n*-hexane. The error bars indicate standard deviations of three repeated determinations.

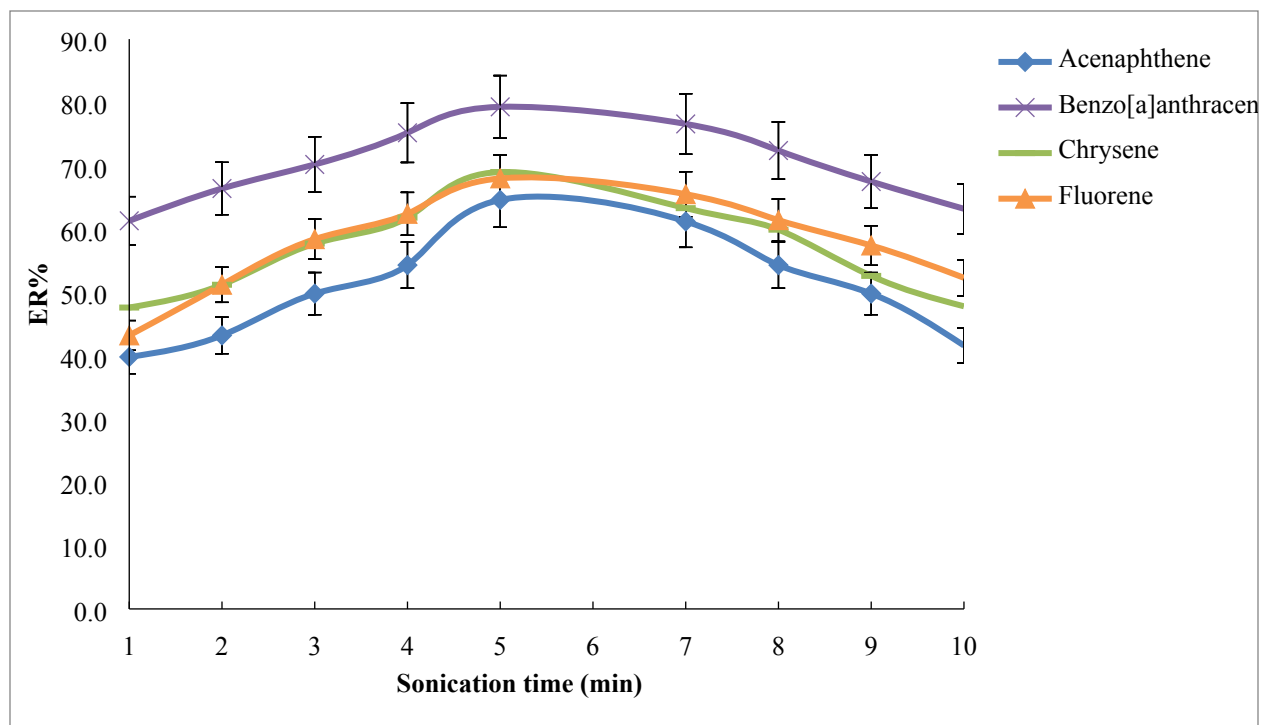

Fig. S5. Optimization of sonication time

Extraction conditions: are the same as those used in Fig. S4, except NaCl concentration which was 2M.

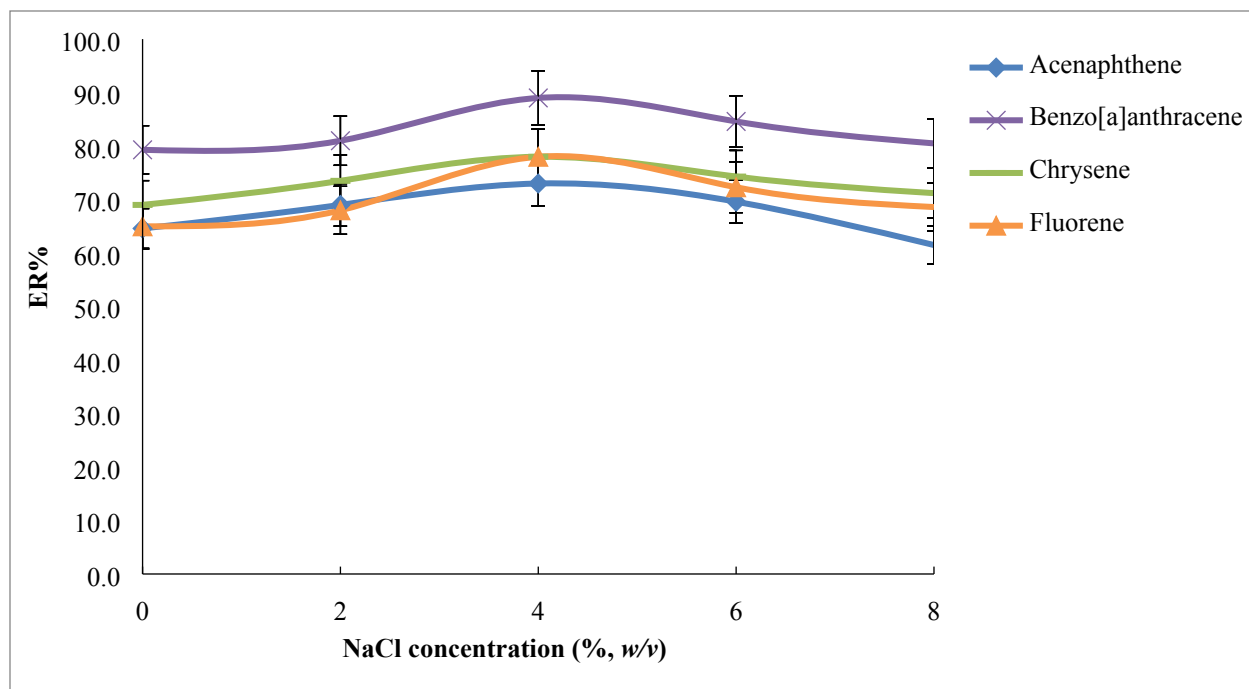

Fig. S6. Optimization of NaCl concentration

Extraction conditions: are the same as those used in Fig. 5S, except 5.0 min was selected for sonication time.

Table S1. Results of assays to check the sample matrices effect for PAHs. Analytes contents of the samples were subtracted.

| Analyte                                                                                   | Mean relative recovery $\pm$ standard deviation (n=3) |            |            |            |            |                   |            |            |            |            |
|-------------------------------------------------------------------------------------------|-------------------------------------------------------|------------|------------|------------|------------|-------------------|------------|------------|------------|------------|
|                                                                                           | Kebab Koobideh samples                                |            |            |            |            | Hamburger samples |            |            |            |            |
|                                                                                           | Sample 1                                              | Sample 2   | Sample 3   | Sample 4   | Sample 5   | Sample 1          | Sample 2   | Sample 3   | Sample 4   | Sample 5   |
| All samples were spiked with each analyte at a concentration of 400 ng kg <sup>-1</sup> . |                                                       |            |            |            |            |                   |            |            |            |            |
| Acenaphthene                                                                              | 99 $\pm$ 4                                            | 93 $\pm$ 4 | 93 $\pm$ 6 | 92 $\pm$ 7 | 92 $\pm$ 7 | 92 $\pm$ 7        | 93 $\pm$ 5 | 92 $\pm$ 7 | 95 $\pm$ 4 | 90 $\pm$ 4 |
| Acenaphthylene                                                                            | 96 $\pm$ 5                                            | 90 $\pm$ 4 | 91 $\pm$ 4 | 95 $\pm$ 5 | 93 $\pm$ 5 | 95 $\pm$ 5        | 90 $\pm$ 4 | 93 $\pm$ 5 | 98 $\pm$ 5 | 95 $\pm$ 7 |
| Anthracene                                                                                | 92 $\pm$ 7                                            | 93 $\pm$ 5 | 95 $\pm$ 7 | 95 $\pm$ 5 | 90 $\pm$ 4 | 93 $\pm$ 6        | 92 $\pm$ 5 | 93 $\pm$ 6 | 90 $\pm$ 6 | 96 $\pm$ 3 |
| Benzo[a]anthracene                                                                        | 95 $\pm$ 5                                            | 95 $\pm$ 5 | 94 $\pm$ 4 | 96 $\pm$ 3 | 93 $\pm$ 6 | 94 $\pm$ 4        | 93 $\pm$ 6 | 95 $\pm$ 5 | 93 $\pm$ 6 | 94 $\pm$ 7 |
| Benzo[b]fluoranthene                                                                      | 90 $\pm$ 6                                            | 90 $\pm$ 4 | 92 $\pm$ 6 | 93 $\pm$ 6 | 97 $\pm$ 5 | 92 $\pm$ 3        | 92 $\pm$ 5 | 98 $\pm$ 4 | 93 $\pm$ 5 | 92 $\pm$ 5 |
| Benzo[k]fluoranthene                                                                      | 94 $\pm$ 5                                            | 95 $\pm$ 5 | 93 $\pm$ 4 | 98 $\pm$ 4 | 93 $\pm$ 6 | 92 $\pm$ 5        | 98 $\pm$ 4 | 95 $\pm$ 7 | 93 $\pm$ 6 | 92 $\pm$ 5 |
| Benzo[ghi]perylene                                                                        | 90 $\pm$ 4                                            | 95 $\pm$ 2 | 93 $\pm$ 6 | 91 $\pm$ 7 | 95 $\pm$ 7 | 92 $\pm$ 5        | 90 $\pm$ 7 | 92 $\pm$ 5 | 97 $\pm$ 5 | 91 $\pm$ 5 |
| Benzo[a]pyrene                                                                            | 95 $\pm$ 5                                            | 94 $\pm$ 4 | 93 $\pm$ 6 | 97 $\pm$ 5 | 93 $\pm$ 6 | 94 $\pm$ 4        | 98 $\pm$ 4 | 92 $\pm$ 5 | 93 $\pm$ 6 | 89 $\pm$ 5 |
| Chrysene                                                                                  | 92 $\pm$ 7                                            | 93 $\pm$ 4 | 98 $\pm$ 4 | 93 $\pm$ 6 | 94 $\pm$ 5 | 94 $\pm$ 4        | 92 $\pm$ 5 | 90 $\pm$ 7 | 90 $\pm$ 6 | 92 $\pm$ 5 |
| Dibenzo[a,h]anthracene                                                                    | 95 $\pm$ 7                                            | 91 $\pm$ 4 | 97 $\pm$ 5 | 93 $\pm$ 7 | 96 $\pm$ 6 | 93 $\pm$ 3        | 92 $\pm$ 5 | 92 $\pm$ 4 | 97 $\pm$ 5 | 93 $\pm$ 3 |
| Fluoranthene                                                                              | 95 $\pm$ 7                                            | 94 $\pm$ 5 | 94 $\pm$ 4 | 93 $\pm$ 6 | 93 $\pm$ 6 | 95 $\pm$ 7        | 92 $\pm$ 6 | 93 $\pm$ 7 | 93 $\pm$ 6 | 94 $\pm$ 4 |
| Fluorene                                                                                  | 91 $\pm$ 6                                            | 95 $\pm$ 5 | 93 $\pm$ 6 | 92 $\pm$ 5 | 92 $\pm$ 6 | 96 $\pm$ 5        | 94 $\pm$ 5 | 94 $\pm$ 3 | 96 $\pm$ 2 | 90 $\pm$ 3 |
| Indeno[1,2,3-cd] pyrene                                                                   | 92 $\pm$ 6                                            | 92 $\pm$ 6 | 97 $\pm$ 5 | 94 $\pm$ 5 | 95 $\pm$ 3 | 95 $\pm$ 5        | 95 $\pm$ 3 | 90 $\pm$ 5 | 96 $\pm$ 4 | 94 $\pm$ 5 |
| Naphthalene                                                                               | 98 $\pm$ 6                                            | 93 $\pm$ 5 | 95 $\pm$ 3 | 96 $\pm$ 6 | 95 $\pm$ 3 | 94 $\pm$ 5        | 90 $\pm$ 2 | 95 $\pm$ 3 | 89 $\pm$ 5 | 95 $\pm$ 3 |
| Phenanthrene                                                                              | 94 $\pm$ 4                                            | 90 $\pm$ 4 | 92 $\pm$ 6 | 95 $\pm$ 3 | 92 $\pm$ 5 | 90 $\pm$ 5        | 96 $\pm$ 3 | 96 $\pm$ 5 | 93 $\pm$ 4 | 96 $\pm$ 3 |
| Pyrene                                                                                    | 96 $\pm$ 4                                            | 92 $\pm$ 4 | 94 $\pm$ 5 | 94 $\pm$ 7 | 91 $\pm$ 5 | 92 $\pm$ 5        | 90 $\pm$ 5 | 94 $\pm$ 2 | 92 $\pm$ 5 | 94 $\pm$ 7 |
| All samples were spiked with each analyte at a concentration of 800 ng kg <sup>-1</sup> . |                                                       |            |            |            |            |                   |            |            |            |            |
| Acenaphthene                                                                              | 96 $\pm$ 2                                            | 92 $\pm$ 4 | 94 $\pm$ 6 | 92 $\pm$ 5 | 96 $\pm$ 5 | 90 $\pm$ 4        | 95 $\pm$ 3 | 94 $\pm$ 6 | 94 $\pm$ 2 | 98 $\pm$ 4 |
| Acenaphthylene                                                                            | 90 $\pm$ 6                                            | 92 $\pm$ 7 | 95 $\pm$ 3 | 97 $\pm$ 5 | 99 $\pm$ 5 | 99 $\pm$ 5        | 97 $\pm$ 4 | 95 $\pm$ 5 | 92 $\pm$ 4 | 91 $\pm$ 5 |
| Anthracene                                                                                | 94 $\pm$ 2                                            | 91 $\pm$ 5 | 92 $\pm$ 4 | 92 $\pm$ 6 | 95 $\pm$ 3 | 99 $\pm$ 5        | 92 $\pm$ 2 | 90 $\pm$ 3 | 93 $\pm$ 3 | 97 $\pm$ 5 |
| Benzo[a]anthracene                                                                        | 94 $\pm$ 5                                            | 90 $\pm$ 8 | 97 $\pm$ 5 | 96 $\pm$ 2 | 99 $\pm$ 4 | 97 $\pm$ 3        | 94 $\pm$ 4 | 96 $\pm$ 5 | 94 $\pm$ 5 | 90 $\pm$ 7 |
| Benzo[b]fluoranthene                                                                      | 94 $\pm$ 5                                            | 99 $\pm$ 5 | 95 $\pm$ 6 | 98 $\pm$ 2 | 97 $\pm$ 6 | 97 $\pm$ 5        | 99 $\pm$ 6 | 92 $\pm$ 5 | 96 $\pm$ 5 | 95 $\pm$ 7 |
| Benzo[k]fluoranthene                                                                      | 98 $\pm$ 3                                            | 91 $\pm$ 2 | 93 $\pm$ 5 | 93 $\pm$ 6 | 95 $\pm$ 6 | 95 $\pm$ 5        | 92 $\pm$ 7 | 90 $\pm$ 4 | 95 $\pm$ 4 | 97 $\pm$ 4 |
| Benzo[ghi]perylene                                                                        | 92 $\pm$ 5                                            | 98 $\pm$ 4 | 96 $\pm$ 6 | 92 $\pm$ 6 | 94 $\pm$ 5 | 91 $\pm$ 4        | 96 $\pm$ 5 | 90 $\pm$ 4 | 94 $\pm$ 5 | 90 $\pm$ 3 |
| Benzo[a]pyrene                                                                            | 94 $\pm$ 5                                            | 99 $\pm$ 5 | 95 $\pm$ 2 | 93 $\pm$ 6 | 91 $\pm$ 3 | 92 $\pm$ 5        | 91 $\pm$ 6 | 92 $\pm$ 3 | 90 $\pm$ 6 | 90 $\pm$ 7 |
| Chrysene                                                                                  | 94 $\pm$ 4                                            | 98 $\pm$ 2 | 92 $\pm$ 6 | 96 $\pm$ 4 | 97 $\pm$ 5 | 92 $\pm$ 4        | 93 $\pm$ 5 | 89 $\pm$ 6 | 92 $\pm$ 7 | 95 $\pm$ 2 |
| Dibenzo[a,h]anthracene                                                                    | 96 $\pm$ 3                                            | 94 $\pm$ 3 | 99 $\pm$ 7 | 95 $\pm$ 6 | 93 $\pm$ 6 | 95 $\pm$ 3        | 94 $\pm$ 7 | 95 $\pm$ 4 | 94 $\pm$ 6 | 95 $\pm$ 7 |
| Fluoranthene                                                                              | 92 $\pm$ 6                                            | 92 $\pm$ 5 | 95 $\pm$ 4 | 92 $\pm$ 5 | 98 $\pm$ 4 | 94 $\pm$ 8        | 95 $\pm$ 5 | 90 $\pm$ 4 | 96 $\pm$ 4 | 93 $\pm$ 6 |
| Fluorene                                                                                  | 96 $\pm$ 7                                            | 92 $\pm$ 2 | 90 $\pm$ 7 | 94 $\pm$ 4 | 98 $\pm$ 5 | 95 $\pm$ 7        | 90 $\pm$ 5 | 98 $\pm$ 4 | 92 $\pm$ 4 | 93 $\pm$ 6 |
| Indeno[1,2,3-cd] pyrene                                                                   | 92 $\pm$ 4                                            | 92 $\pm$ 3 | 92 $\pm$ 5 | 94 $\pm$ 3 | 96 $\pm$ 4 | 96 $\pm$ 2        | 98 $\pm$ 5 | 97 $\pm$ 2 | 95 $\pm$ 5 | 97 $\pm$ 5 |
| Naphthalene                                                                               | 95 $\pm$ 4                                            | 94 $\pm$ 4 | 92 $\pm$ 5 | 94 $\pm$ 4 | 94 $\pm$ 7 | 94 $\pm$ 4        | 97 $\pm$ 4 | 92 $\pm$ 3 | 94 $\pm$ 6 | 92 $\pm$ 4 |
| Phenanthrene                                                                              | 95 $\pm$ 6                                            | 94 $\pm$ 5 | 92 $\pm$ 6 | 92 $\pm$ 6 | 90 $\pm$ 5 | 95 $\pm$ 4        | 95 $\pm$ 7 | 92 $\pm$ 4 | 98 $\pm$ 2 | 94 $\pm$ 6 |
| Pyrene                                                                                    | 92 $\pm$ 6                                            | 95 $\pm$ 3 | 94 $\pm$ 5 | 95 $\pm$ 6 | 93 $\pm$ 5 | 92 $\pm$ 5        | 94 $\pm$ 7 | 90 $\pm$ 4 | 92 $\pm$ 5 | 90 $\pm$ 7 |
